# Supplementary material for: Development of a structure-based computational simulation to optimize the blocking efficacy of pro-antibodies
Source: Royal Society of Chemistry journal article supplement (doi:10.1039/d1sc01748a), 2021-01-01
Supplement: d1sc01748a1.pdf [file d1sc01748a1.pdf]

### Supplementary Table S1: Development of various pro-Abs with different blocking fold

We identified good candidate pro-Abs that achieved  $\geq 100$ -fold blocking with targeted Ags including pro-infliximab,  $\alpha$ -hu-CD19, PD-1, IL-1 $\beta$ , CTLA-4, mouse PD-1 and mouse CD3 Ab. In contrast, the bad pro-Abs did not reach 100-fold such as  $\alpha$ -mouse CTLA-4, human EGFR and CD52 Ab. (-: not shown in the Table 1)

| Targeted Ag                                             | Blocking fold | Linker |
|---------------------------------------------------------|---------------|--------|
| Good blocking ability ( $\geq 100$ fold)                |               |        |
| human TNF $\alpha$<br>(pro-Infliximab <sup>[19]</sup> ) | 395           | L3     |
| human CD19                                              | 269           | L1     |
| human PD-1                                              | 250           | L2     |
| human IL-1 $\beta$                                      | 186           | L4     |
| human CTLA-4                                            | 150           | L2     |
| mouse PD-1                                              | 135           | L3     |
| mouse CD3                                               | 114           | -      |
| Bad blocking ability (<100 fold)                        |               |        |
| mouse CTLA-4                                            | 82            | L3     |
| human EGFR                                              | 49            | L4     |
| human CD52                                              | 20            | -      |
